# Supplementary material
Source: PubMed Central journal article supplement (PMC8848836)
Supplement: NIHMS1775268-supplement-2.pdf [file NIHMS1775268-supplement-2.pdf]

## Supplemental Information

### Substrate-specific allosteric effects on the enhancement of CYP17A1 lyase efficiency by cytochrome b<sub>5</sub>

#### Authors:

Yilin Liu<sup>1</sup>, Ilia G. Denisov<sup>2</sup>, Stephen G. Sligar<sup>2\*</sup>, and James R. Kincaid<sup>1\*</sup>

1. Department of Chemistry, Marquette University, 1414W Clybourn Street, Milwaukee, WI. 53233 (USA)

Email: james.kincaid@mu.edu

2. Departments of Biochemistry and Chemistry, University of Illinois, 116 Morrill Hall, 505 S. Goodwin Avenue, Urbana, IL 61801 (USA)

Email: s-sligar@illinois.edu

#### Methods

Although low concentrations of Cytb<sub>5</sub> significantly stimulate the lyase activity of human P450 CYP17A1,<sup>1</sup> higher concentrations prevent formation of the P450-CPR complex and thus has been shown to inhibit the catalytic activity.<sup>1-3</sup> Considering the importance of controlling the stoichiometry of protein-protein interactions, and the aggregation states of the membrane proteins under investigation, we use the Nanodisc system.<sup>3</sup> Incorporation of monomeric CYP17A1 in the lipid bilayer of Nanodiscs provides a well characterized and stable preparation of fully functional enzyme, as described in previous studies.<sup>3,5,6,8</sup> The manganese protoporphyrin replaced cytochrome b<sub>5</sub> (Mn-Cytb<sub>5</sub>) is used as an isostructural analog that is inactive in electron transfer due to the very rapid autoxidation of Mn(II) structure.<sup>4</sup> Importantly, the use of Mn-Cytb<sub>5</sub> avoids spectroscopic interference with the iron P450 heme allowing improved sensitivity for documenting the vibrational modes of the iron-oxygen complex that reflect changes in the positioning of the substrate in the active site.

The expression and purification of CYP17A1 was performed as described.<sup>5</sup> Reconstitution of Cytb<sub>5</sub> with manganese protoporphyrin IX was performed as described.<sup>3</sup> Nanodiscs with CYP17A1 were assembled as documented.<sup>5,6</sup> Briefly, human CYP17A1 with histidine affinity tag and cytochrome b<sub>5</sub> from rabbit, both containing full-length trans-membrane helical anchors, were

expressed in *E. coli*. Nanodiscs were assembled with purified CYP17A1 and His-tag cleaved MSP1D1 solubilized with POPC lipids and Triton X-100 with the final ratio of CYP17A1:MSP1D1:POPC:Triton 1:10:650:750. Following 30 min incubation on ice, self-assembly of Nanodiscs was initiated by addition of 1 g of Amberlite per 1 mL of reconstitution solution. After 5 hr incubation at 4° C, Amberlite was removed by filtration, and Nanodiscs with CYP17A1 were purified using Ni-NTA affinity column and then size-exclusion chromatography on Superdex 200 10/300 GL column (GE Life Sciences). Incorporation of Mn substituted Cytb5 (Mn-Cytb5) into purified CYP17A1 Nanodiscs was performed by direct addition of Mn-Cytb5 to the reconstitution mixture in a 2-fold molar excess, as documented.<sup>7-9</sup>

### **Resonance Raman sample preparation**

To better investigate effects of cytochrome b<sub>5</sub> on the H-bonding interactions in the CYP17A1 distal pocket, two substrates, 17 $\alpha$ -hydroxyprogesterone (OH-PROG) or 17 $\alpha$ -hydroxypregnenolone (OH-PREG) were incubated with CYP17A1 in Nanodiscs in the presence of a 2-fold excess Mn-Cytb<sub>5</sub>. Cytochrome b<sub>5</sub> is known to spontaneously anchor in a phospholipid bilayer due to its simple single trans-membrane helix. Samples for rR spectroscopy contained 250  $\mu$ M CYP17A1 in Nanodiscs, 0.1 M potassium phosphate, pH 7.4, 0.2 M NaCl, and 400  $\mu$ M of 17 $\alpha$ -hydroxyprogesterone or 17 $\alpha$ -hydroxypregnenolone (Sigma Aldrich). Solutions were prepared in distilled 30% (v/v) glycerol in H<sub>2</sub>O buffer starting by degassing the samples by connecting the NMR tube to a vacuum line and refilling with argon gas. This process is repeated for three times to ensure complete deoxygenation. Samples were reduced under anaerobic conditions by titrating with a 0.9~1.0 fold molar excess of sodium dithionite in the presence of 6.25  $\mu$ M methyl-viologen. Each sample was reduced at room temperature and then transferred to a dry ice-ethanol bath held at -20 °C where it was cooled for 2 minutes. Oxy-ferrous complexes were formed by bubbling <sup>16</sup>O<sub>2</sub> or <sup>18</sup>O<sub>2</sub> for 7 seconds, followed by rapid freezing in liquid N<sub>2</sub>.

### **Resonance Raman Measurements**

To determine the effect of Cytb<sub>5</sub> on the heme stretching modes of ferric CYP17A1, we employed Mn-Cytb<sub>5</sub>. This was done to prevent interference from the heme of Cytb<sub>5</sub> as was previously reported by Mak and coworkers in rR studies of CYP2B4.<sup>10</sup> We acquired resonance Raman spectra after adding 2-fold excess of Mn-Cytb<sub>5</sub>. The spectra of frozen dioxygenated

samples were obtained using the 413.1 nm excitation line from a Krypton ion laser (Coherent Innova Sabre Ion Laser), which effectively enhances the internal modes of the Fe-O-O fragment. Each oxygenated sample was measured for 4 hours with very low power (1 mW) maintained on the sample. The rR spectra of all samples were measured using a Spex 1269 spectrometer equipped with a Spec-10 LN liquid nitrogen-cooled detector (Princeton Instruments, NJ). All samples were measured in a spinning NMR tube to avoid local heating and protein degradation. The spectra were collected using a 180° backscattering geometry, and the laser beam was focused on the sample with a line image using a cylindrical lens. Spectra were calibrated with data acquired for fenchone and processed with Grams/32 AI software (Galactic Industries, Salem, NH).

## References

- S1. Im, S.-C., and Waskell, L. The interaction of microsomal cytochrome P450 2B4 with its redox partners, cytochrome P450 reductase and cytochrome b5, *Arch. Biochem. Biophys.* **2011**, *507*, 144-153.
- S2. Zhang, H., Hamdane, D., Im, S.-C., and Waskell, L. Cytochrome b5 Inhibits Electron Transfer from NADPH-Cytochrome P450 Reductase to Ferric Cytochrome P450 2B4, *J. Biol. Chem.* **2008**, *283*, 5217-5225.
- S3. Duggal, R., Liu, Y. L., Gregory, M. C., Denisov, I. G., Kincaid, J. R., and Sligar, S. G. Evidence that cytochrome b(5) acts as a redox donor in CYP17A1 mediated androgen synthesis, *Biochem. Biophys. Res. Commun.* **2016**, *477*, 202-208.
- S4. Morgan, E. T., and Coon, M. J. Effects of cytochrome b5 on cytochrome P-450-catalyzed reactions. Studies with manganese-substituted cytochrome b5, *Drug Metab Dispos.* **1984**, *12*, 358-364.
- S5. Gregory, M., Mak, P. J., Sligar, S. G., and Kincaid, J. R. Differential Hydrogen Bonding in Human CYP17 Dictates Hydroxylation versus Lyase Chemistry, *Angew. Chem. Int. Edit.* **2013**, *52*, 5342-5345.
- S6. Luthra, A., Gregory, M., Grinkova, Y. V., Denisov, I. G., and Sligar, S. G. Nanodiscs in the studies of membrane-bound cytochrome P450 enzymes, *Methods. Mol. Biol.* **2013**, *987*, 115-127.
- S7. Grinkova, Y. V., Denisov, I. G., and Sligar, S. G. Functional reconstitution of monomeric CYP3A4 with multiple cytochrome P450 reductase molecules in Nanodiscs, *Biochem. Biophys. Res. Commun.* **2010**, *398*, 194-198.
- S8. Gregory, M. C., Denisov, I. G., Grinkova, Y. V., Khatri, Y., and Sligar, S. G. Kinetic Solvent Isotope Effect in Human P450 CYP17A1-Mediated Androgen Formation: Evidence for a Reactive Peroxoanion Intermediate, *J. Am. Chem. Soc.* **2013**, *135*, 16245-16247.
- S9. Khatri, Y., Gregory, M. C., Grinkova, Y. V., Denisov, I. G., and Sligar, S. G. Active site proton delivery and the lyase activity of human CYP17A1, *Biochem. Biophys. Res. Commun.* **2014**, *443*, 179-184.

- S10. Mak, P. J., Im, S. C., Zhang, H. M., Waskell, L. A., and Kincaid, J. R. Resonance Raman studies of cytochrome P4502B4 in its interactions with substrates and redox partners, *Biochemistry*. **2008**, *47*, 3950-3963.
